# Supplementary material
Source: PubMed Central journal article supplement (PMC3718637)
Supplement: NIHMS488443-supplement-1_si_001.pdf [file NIHMS488443-supplement-1_si_001.pdf]

## ***Supporting Information for***

### **Inducers of Hypoxic Response: Marine Sesquiterpene Quinones Activate HIF-1**

Lin Du,<sup>†,§</sup> Yu-Dong Zhou,<sup>\*,†</sup> Dale G. Nagle<sup>\*,†,‡</sup>

<sup>†</sup>Department of Pharmacognosy and <sup>‡</sup>Research Institute of Pharmaceutical Sciences, School of Pharmacy, University of Mississippi, University, Mississippi 38677, United States

#### **Contents**

|                                                                     |            |
|---------------------------------------------------------------------|------------|
| <sup>1</sup> H-NMR (CDCl <sub>3</sub> ) spectrum of <b>2</b> .....  | <b>S1</b>  |
| <sup>13</sup> C-NMR (CDCl <sub>3</sub> ) spectrum of <b>2</b> ..... | <b>S2</b>  |
| <sup>1</sup> H-NMR (CDCl <sub>3</sub> ) spectrum of <b>3</b> .....  | <b>S3</b>  |
| <sup>13</sup> C-NMR (CDCl <sub>3</sub> ) spectrum of <b>3</b> ..... | <b>S4</b>  |
| <sup>1</sup> H-NMR (CDCl <sub>3</sub> ) spectrum of <b>4</b> .....  | <b>S5</b>  |
| <sup>13</sup> C-NMR (CDCl <sub>3</sub> ) spectrum of <b>4</b> ..... | <b>S6</b>  |
| <sup>1</sup> H-NMR (CDCl <sub>3</sub> ) spectrum of <b>5</b> .....  | <b>S7</b>  |
| <sup>13</sup> C-NMR (CDCl <sub>3</sub> ) spectrum of <b>5</b> ..... | <b>S8</b>  |
| <sup>1</sup> H-NMR (CDCl <sub>3</sub> ) spectrum of <b>6</b> .....  | <b>S9</b>  |
| <sup>13</sup> C-NMR (CDCl <sub>3</sub> ) spectrum of <b>6</b> ..... | <b>S10</b> |
| Purity of <b>1–9</b> .....                                          | <b>S11</b> |

**<sup>1</sup>H-NMR (CDCl<sub>3</sub>) spectrum of 2**

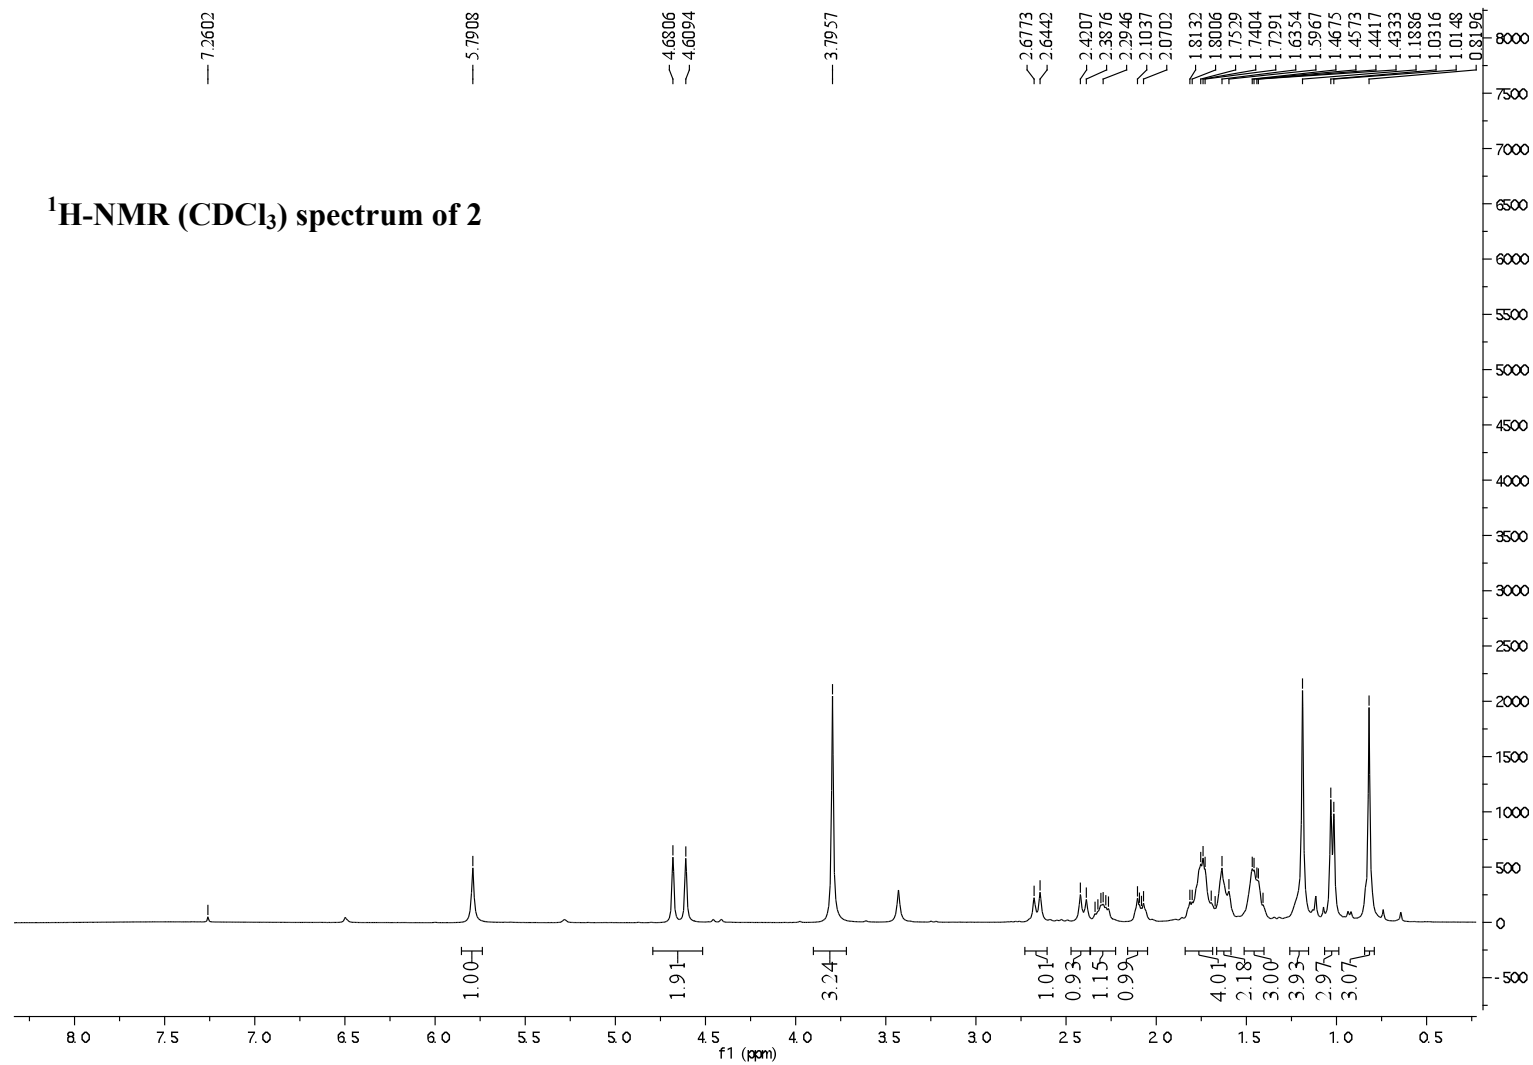

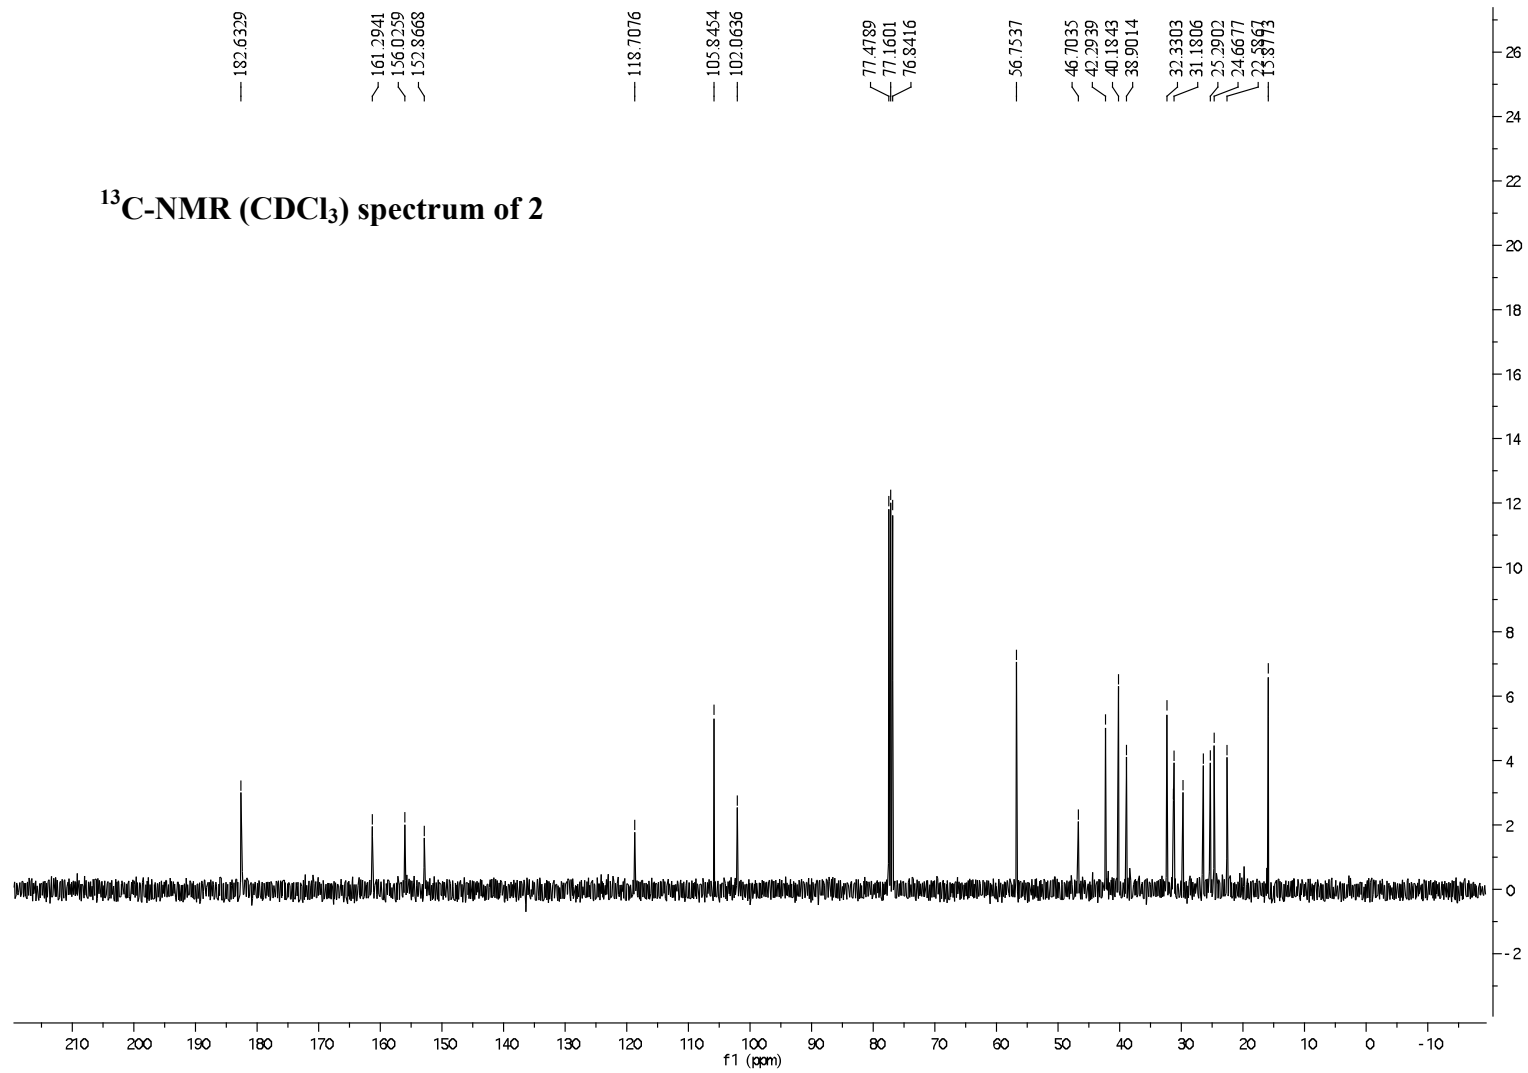

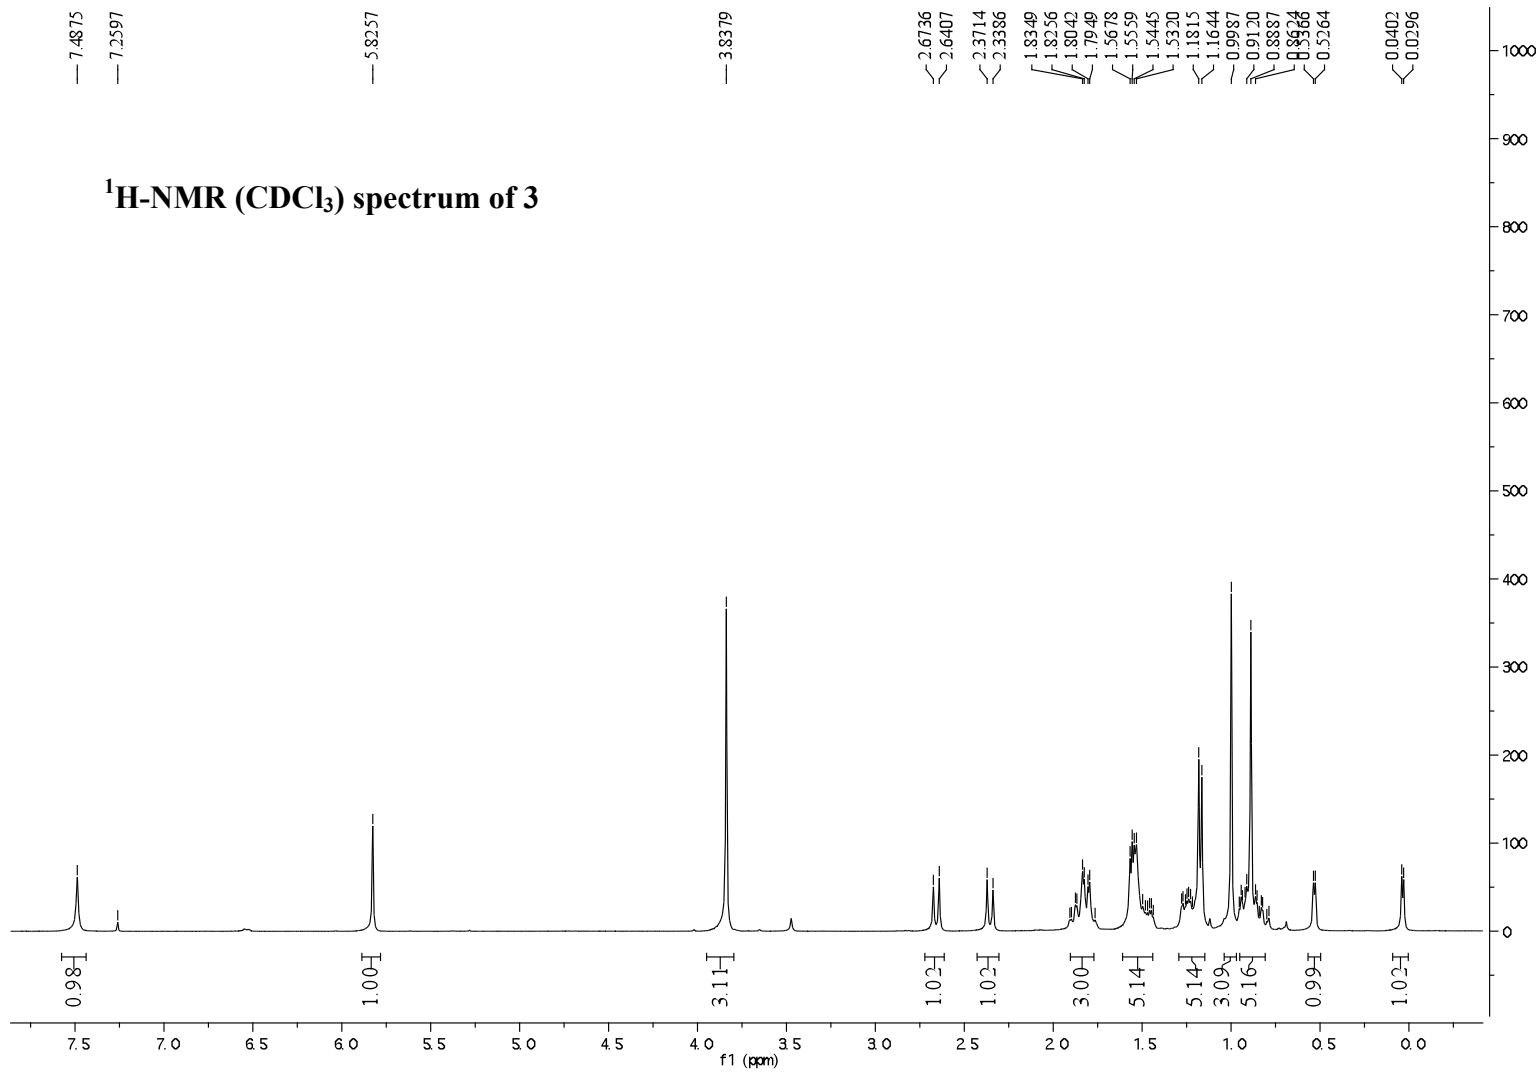

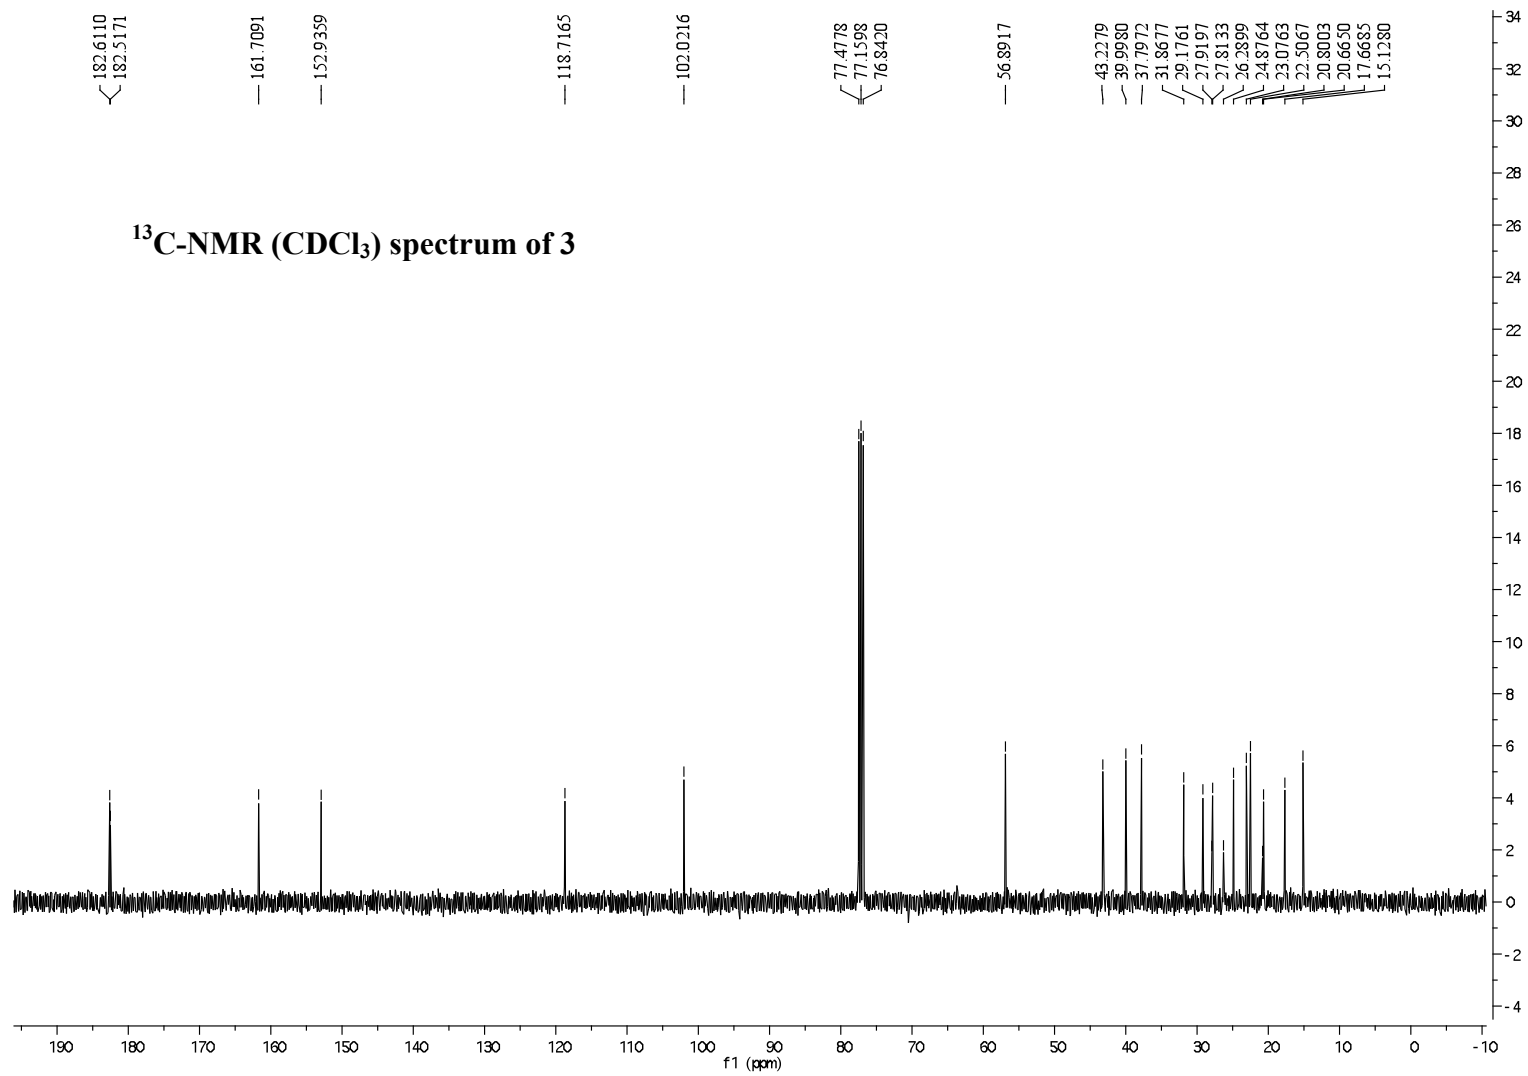

**<sup>1</sup>H-NMR (CDCl<sub>3</sub>) spectrum of 4**

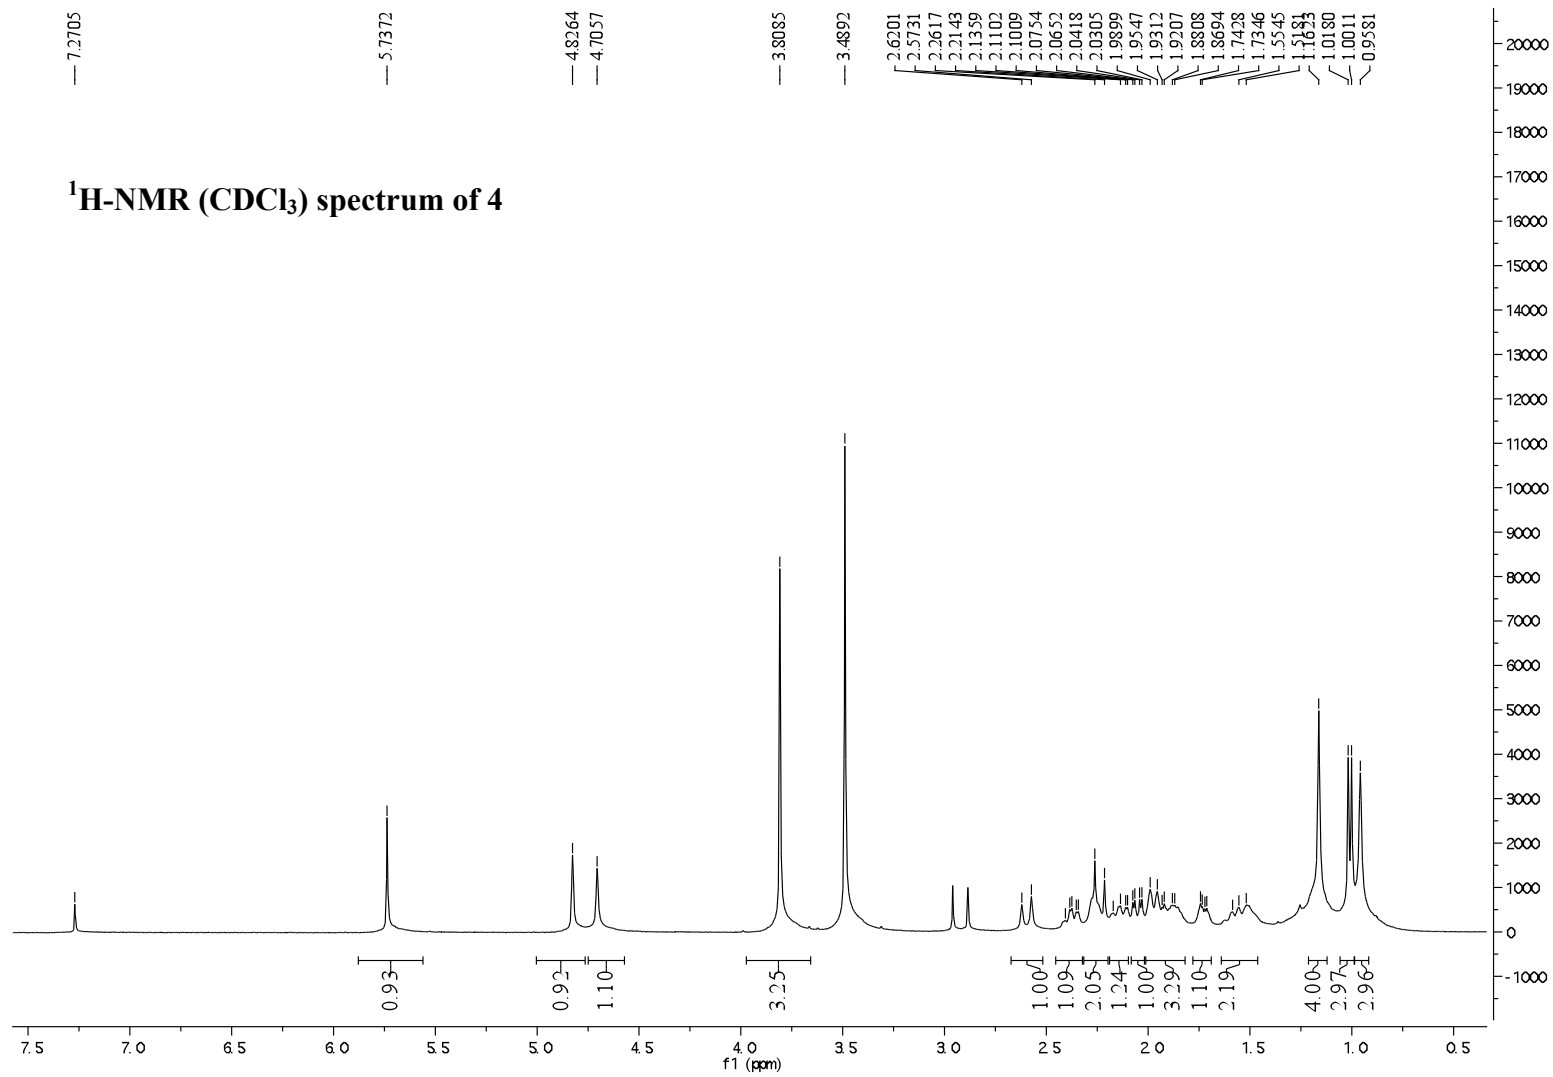

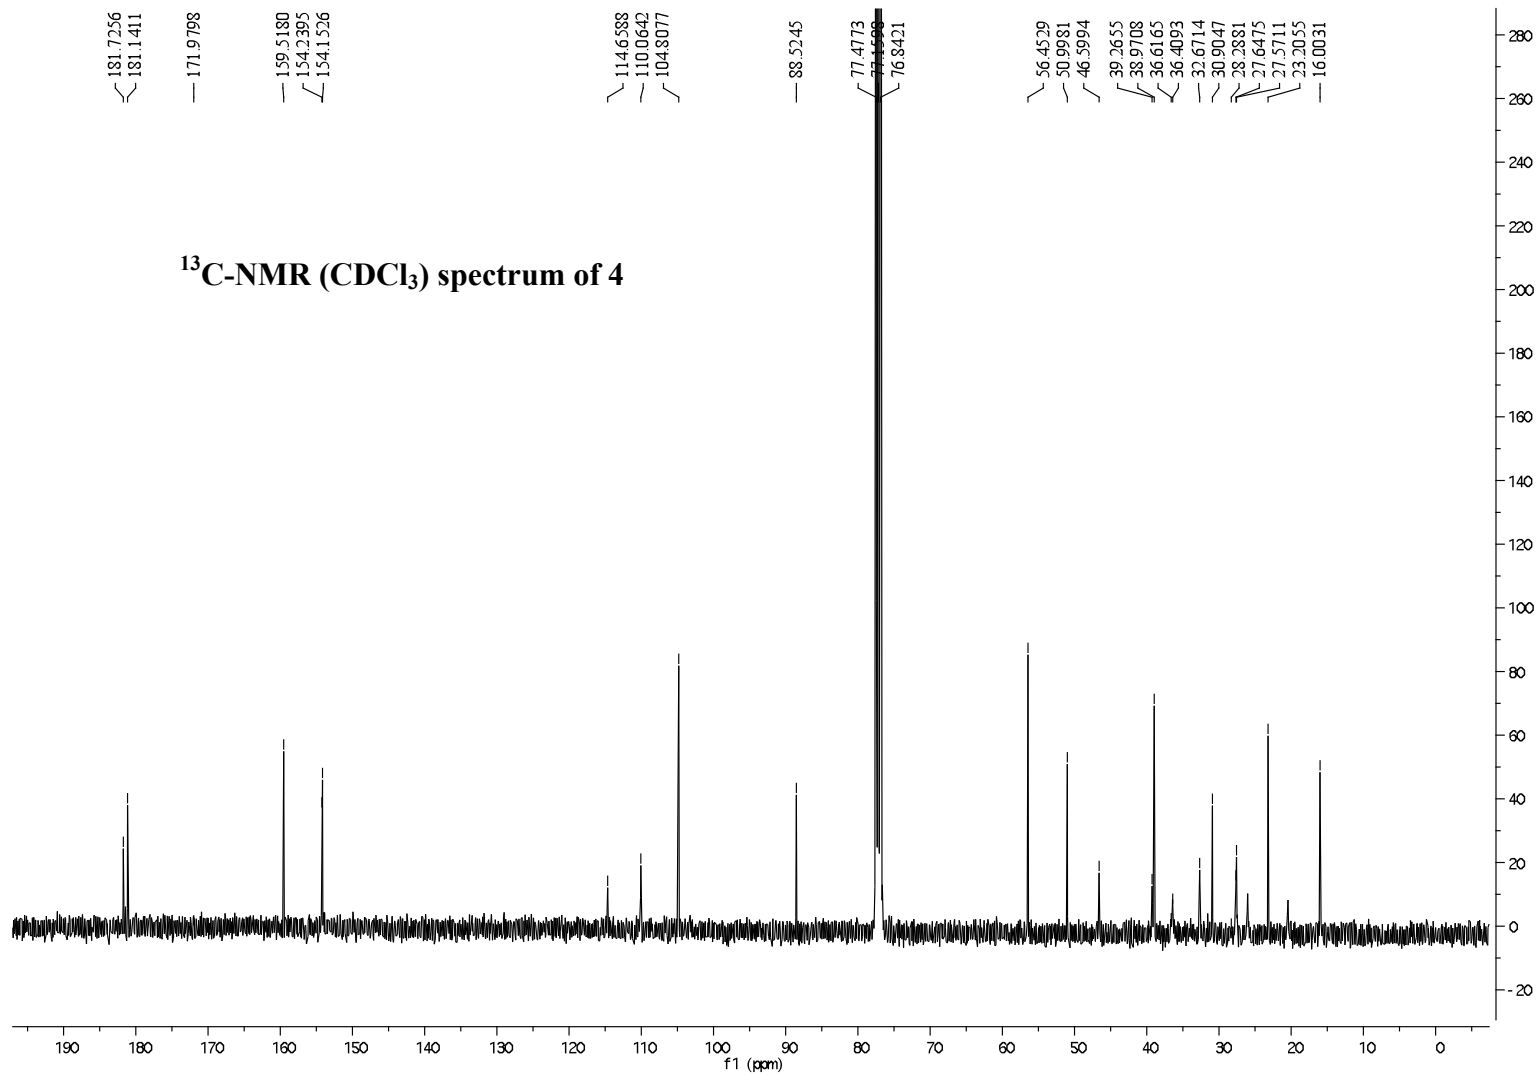

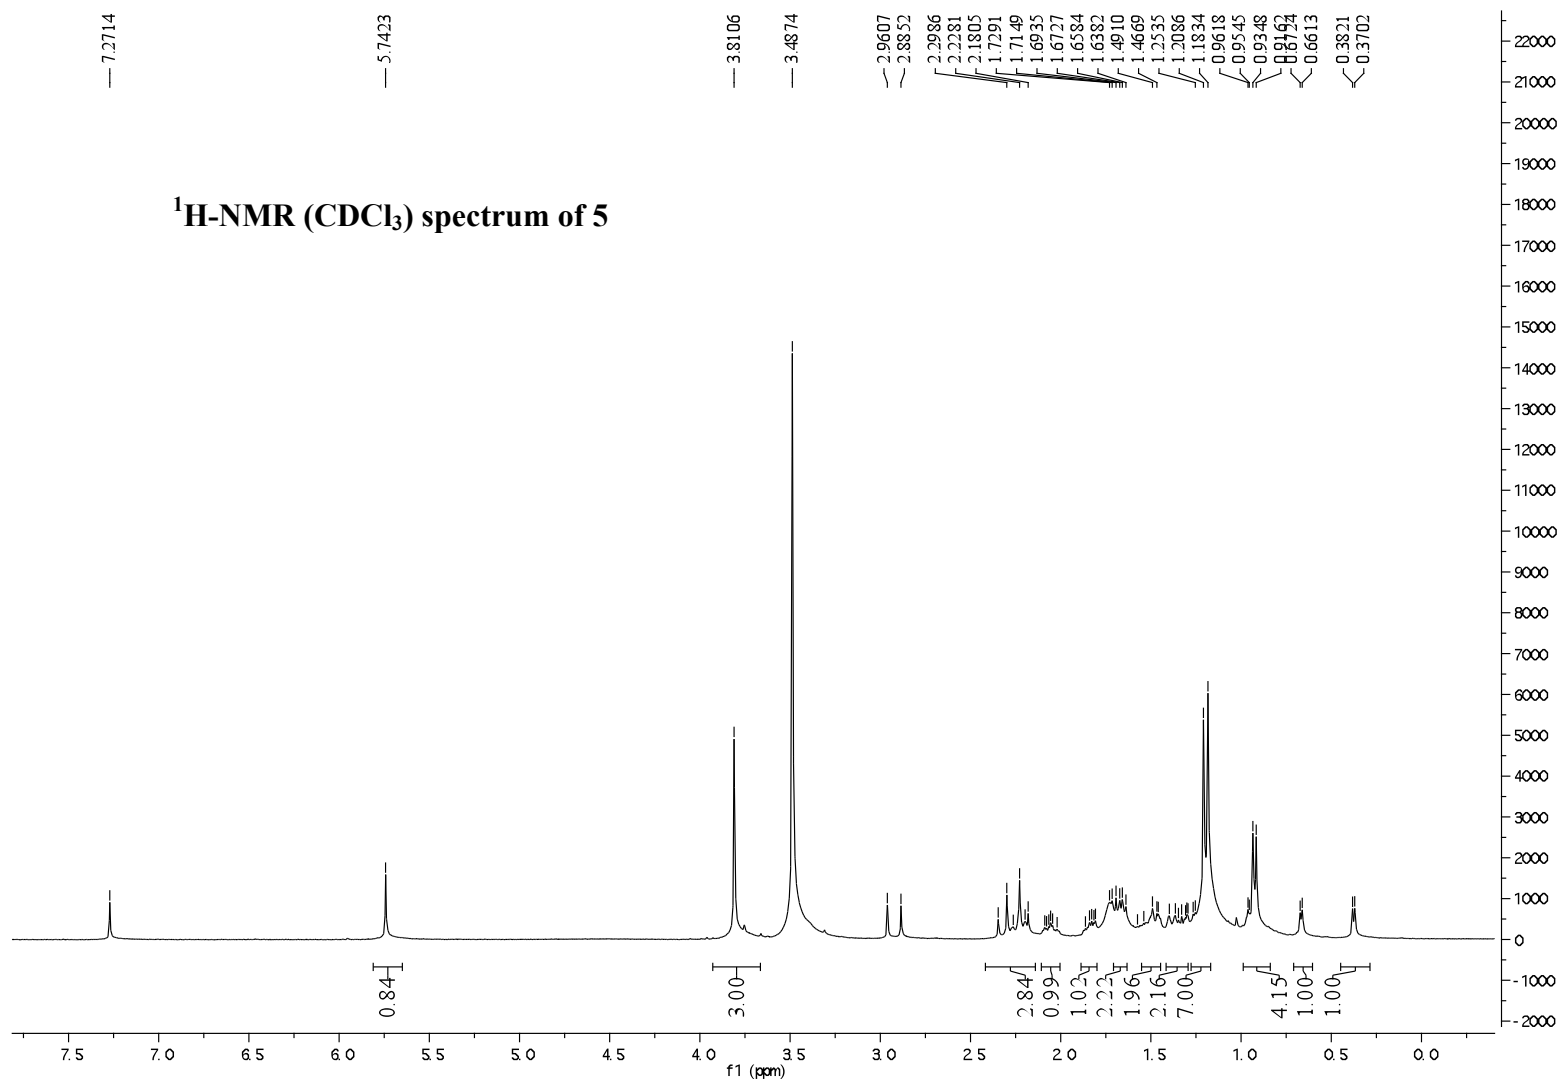



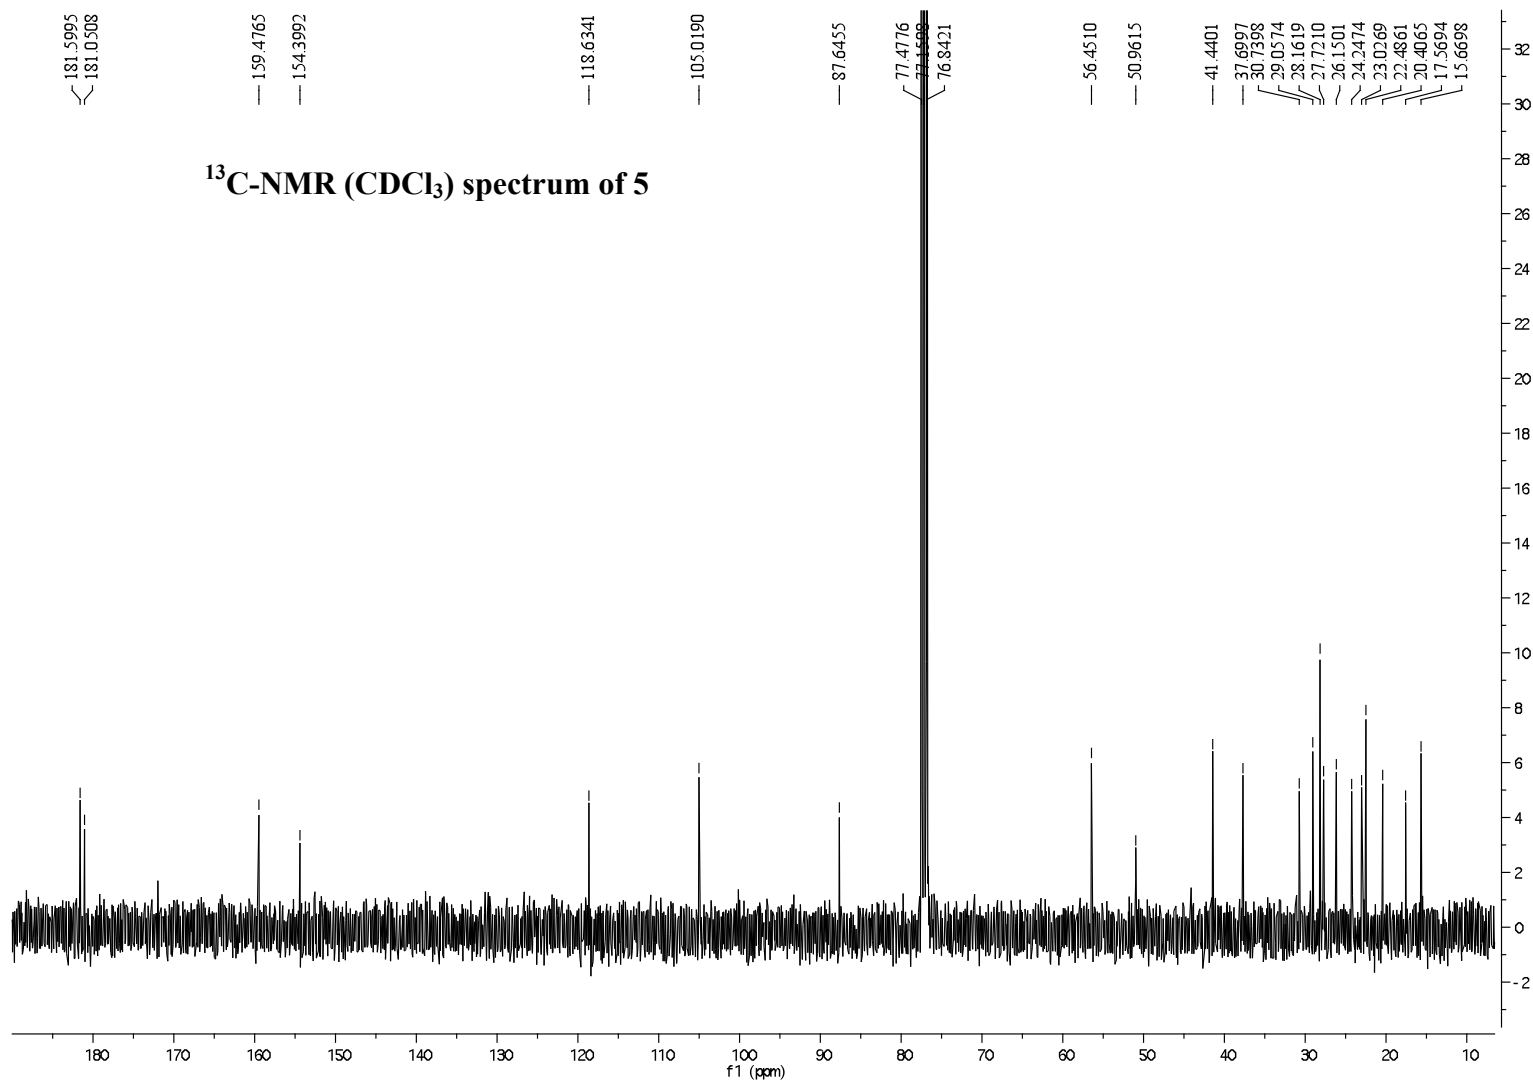

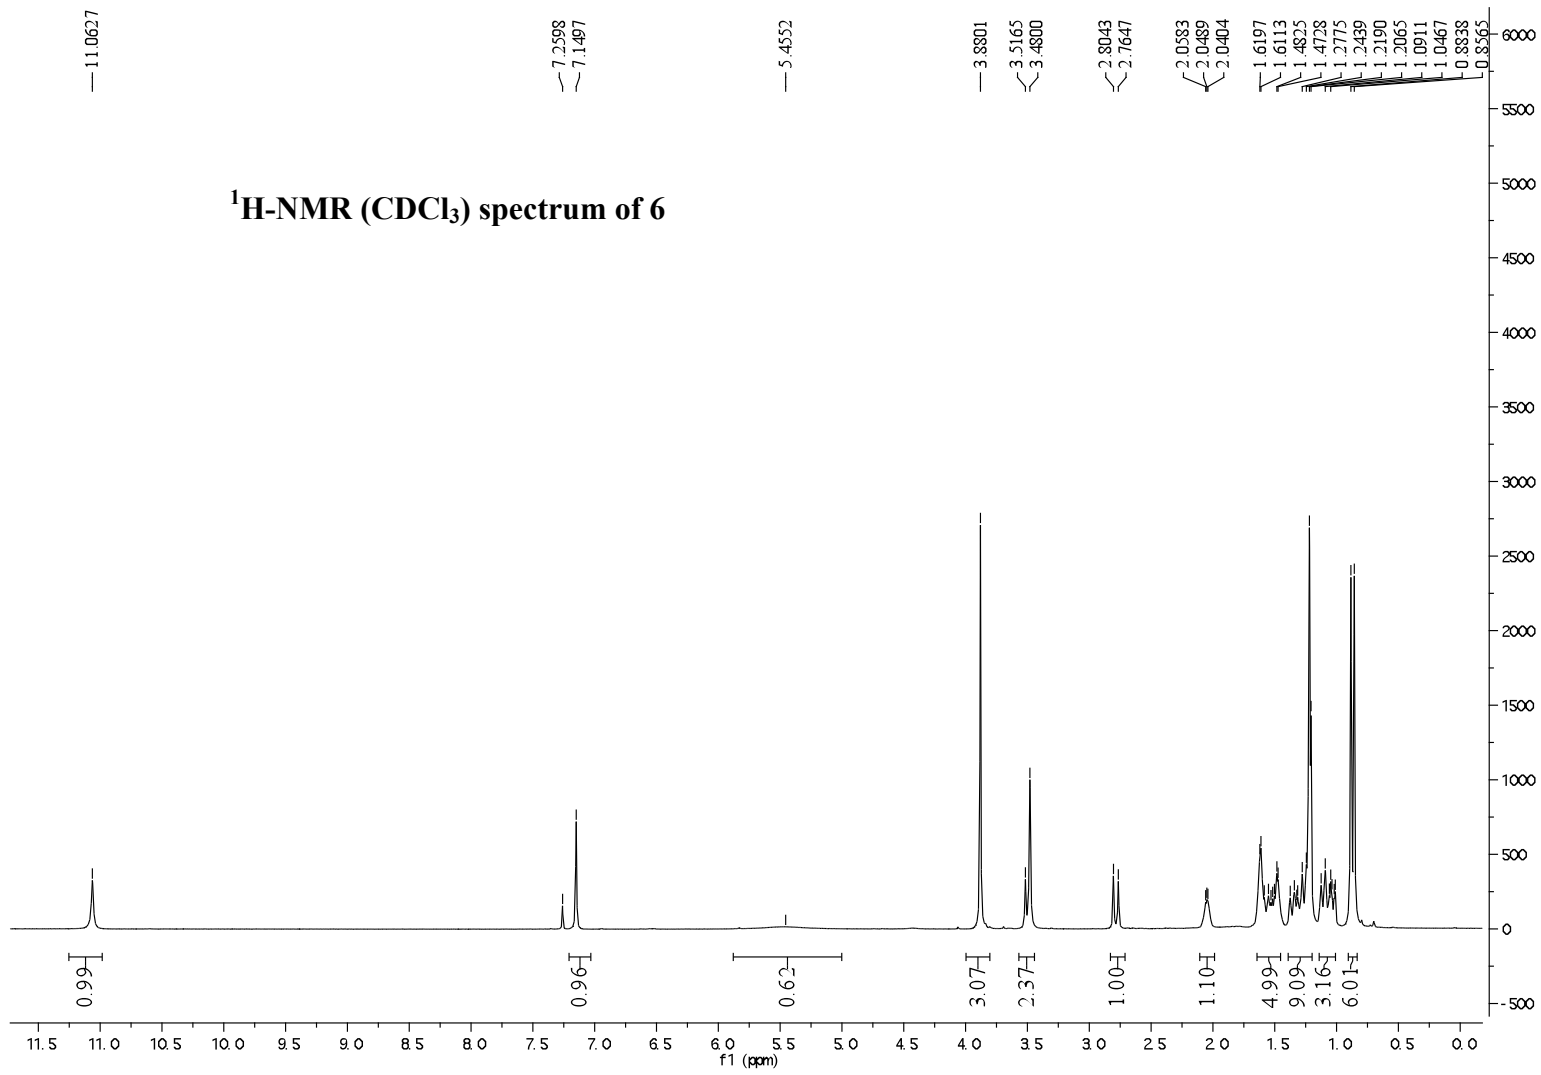

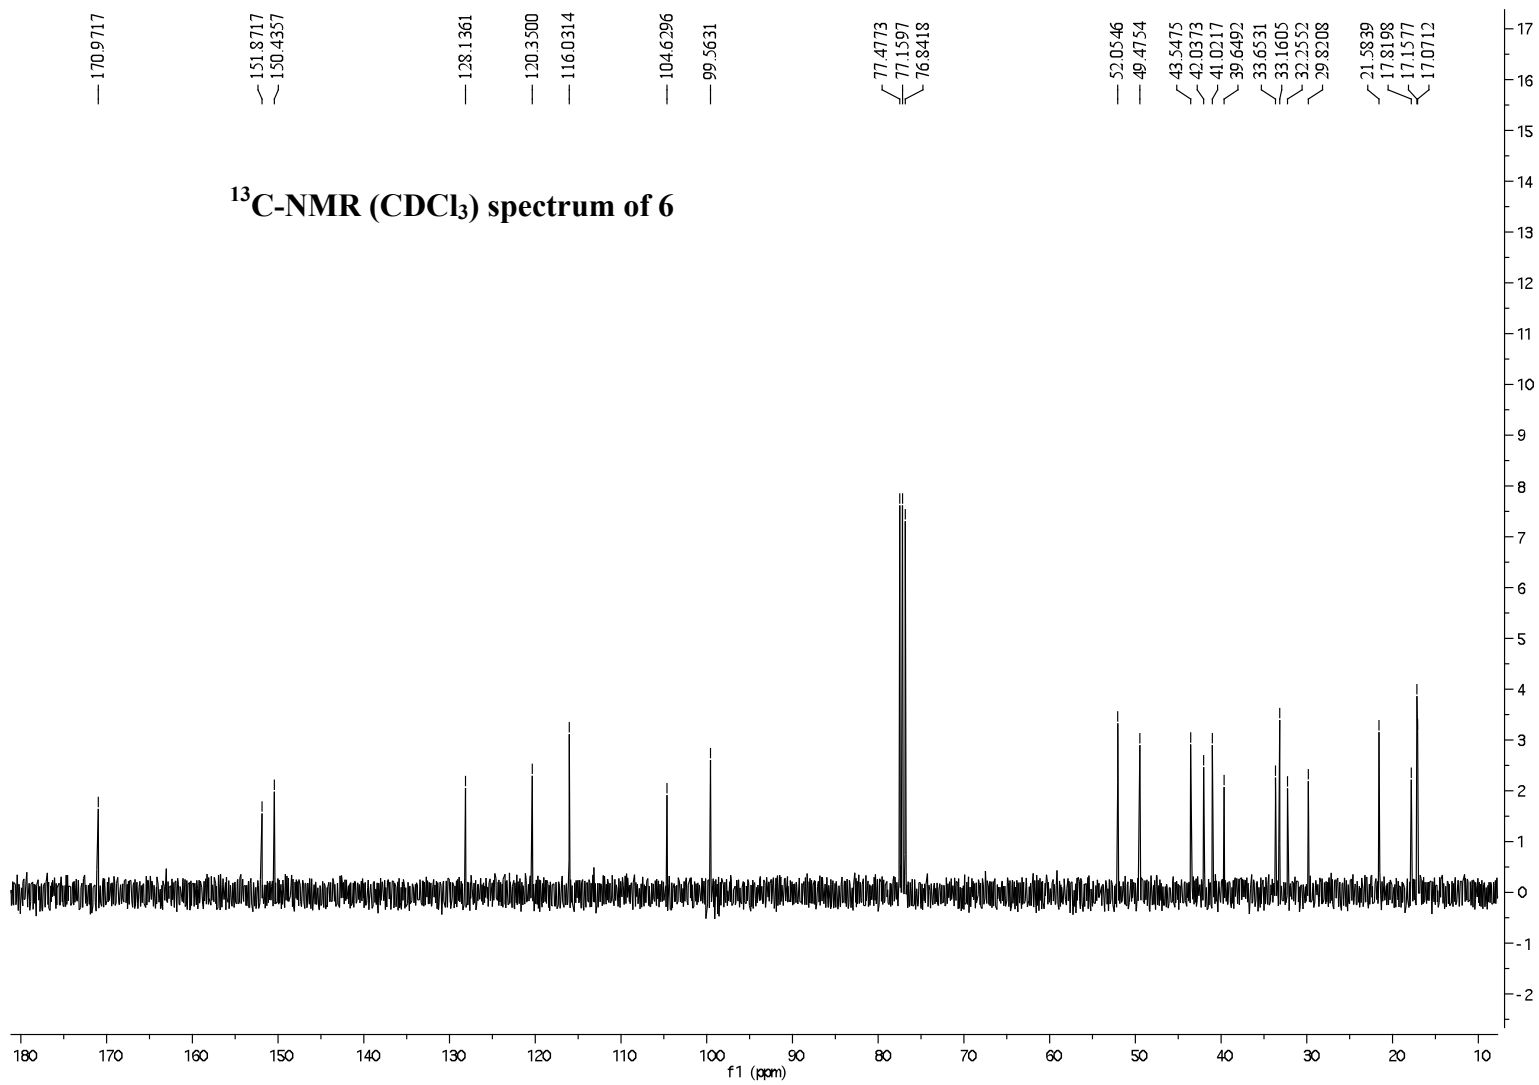

### Purity of 1–9

| <b>Compound</b> | <b>Purity</b> |
|-----------------|---------------|
| <b>1</b>        | 98.0%         |
| <b>2</b>        | 99.1%         |
| <b>3</b>        | 98.4%         |
| <b>4</b>        | 97.5%         |
| <b>5</b>        | 95.1%         |
| <b>6</b>        | 96.9%         |
| <b>7</b>        | 98.3%         |
| <b>8</b>        | 98.3%         |
| <b>9</b>        | 98.0%         |

HPLC was conducted on a Waters system, equipped with a 600 controller, a 996-photodiode array detector, and a semi-preparative HPLC column (Phenomenex Luna, ODS-3, C<sub>18</sub>, 5  $\mu$ m, 250 x 10.00 mm). Isocratic and gradient systems comprising MeCN–H<sub>2</sub>O solvent were used to generate optimal compound resolution. The purities of the compounds were judged on the percentage of the integrated signal at UV 220 nm.
